# Supplementary material for: Temperature-dependent guest reorientation: a reversible order–disorder transformation in a single crystal
Source: Royal Society of Chemistry journal article supplement (doi:10.1039/c3ce41572d), 2013-10-11
Supplement: c3ce41572d.pdf [file c3ce41572d.pdf]

## Supplementary Information

### Temperature-dependent guest reorientation: a reversible order-disorder transformation in a single crystal.

Matteo Lusi and Leonard J. Barbour

#### Single crystal X-ray diffraction:

X-ray diffraction data were collected for the same single crystal at 100, 173 243 and 313 K on a Bruker Apex-II Duo diffractometer employing Mo  $K\alpha$  radiation. The structures was solved and refined using the programs SHELXS-97 and SHELXL-97 respectively. The program X-Seed was used as an interface to the SHELX programs, and to prepare the figures. The atoms of the meta-xylene were refined isotropically

Crystal data for **1<sub>100</sub>**: C<sub>62</sub>H<sub>56</sub>N<sub>6</sub>NiS<sub>2</sub>,  $M = 1007.95$ , lilac plate,  $0.300 \times 0.200 \times 0.050$  mm<sup>3</sup>, monoclinic, space group  $P2_1/n$  (No. 14),  $a = 10.4770(4)$ ,  $b = 23.0584(10)$ ,  $c = 22.7761(9)$  Å,  $\beta = 99.028(2)^\circ$ ,  $V = 5434.1(4)$  Å<sup>3</sup>,  $Z = 4$ ,  $D_c = 1.232$  g/cm<sup>3</sup>,  $F_{000} = 2120$ , MoK $\alpha$  radiation,  $\lambda = 0.71073$  Å,  $T = 100(2)$ K,  $2\theta_{\max} = 60.9^\circ$ , 53528 reflections collected, 14861 unique ( $R_{\text{int}} = 0.0537$ ). Final  $GooF = 1.030$ ,  $RI = 0.0466$ ,  $wR2 = 0.1020$ ,  $R$  indices based on 10178 reflections with  $I > 2(I)$  (refinement on  $F^2$ ), 644 parameters, 0 restraints. Lp and absorption corrections applied,  $\mu = 0.478$  mm<sup>-1</sup>.

Crystal data for **1<sub>173</sub>**: C<sub>62</sub>H<sub>56</sub>N<sub>6</sub>NiS<sub>2</sub>,  $M = 1007.96$ , lilac plate,  $0.30 \times 0.20 \times 0.05$  mm<sup>3</sup>, monoclinic, space group  $P2_1/n$  (No. 14),  $a = 10.4770(4)$ ,  $b = 23.0584(10)$ ,  $c = 22.7761(9)$  Å,  $\beta = 99.028(2)^\circ$ ,  $V = 5434.2(4)$  Å<sup>3</sup>,  $Z = 4$ ,  $D_c = 1.232$  g/cm<sup>3</sup>,  $F_{000} = 2120$ , MoK $\alpha$  radiation,  $\lambda = 0.71073$  Å,  $T = 173(2)$ K,  $2\theta_{\max} = 61.0^\circ$ , 54274 reflections collected, 15062 unique ( $R_{\text{int}} = 0.0731$ ). Final  $GooF = 0.965$ ,  $RI = 0.0572$ ,  $wR2 = 0.1402$ ,  $R$  indices based on 8786 reflections with  $I > 2\sigma(I)$  (refinement on  $F^2$ ), 622 parameters, 1 restraint. Lp and absorption corrections applied,  $\mu = 0.478$  mm<sup>-1</sup>.

Crystal data for **1<sub>243</sub>**: C<sub>62</sub>H<sub>56</sub>N<sub>6</sub>NiS<sub>2</sub>,  $M = 1007.96$ , lilac plate,  $0.30 \times 0.25 \times 0.05$  mm<sup>3</sup>, monoclinic, space group  $C2/c$  (No. 15),  $a = 10.5793(2)$ ,  $b = 23.1141(4)$ ,  $c = 22.8660(4)$  Å,  $\beta = 99.5160(10)^\circ$ ,  $V = 5514.50(17)$  Å<sup>3</sup>,  $Z = 4$ ,  $D_c = 1.214$  g/cm<sup>3</sup>,  $F_{000} = 2120$ , MoK $\alpha$  radiation,  $\lambda = 0.71073$  Å,  $T = 243(2)$ K,  $2\theta_{\max} = 60.9^\circ$ , 27586 reflections collected, 7636 unique ( $R_{\text{int}} = 0.1401$ ). Final  $GooF = 0.852$ ,  $RI = 0.0609$ ,  $wR2 = 0.1583$ ,  $R$  indices based on 4045 reflections with  $I > 2\sigma(I)$  (refinement on  $F^2$ ), 323 parameters, 1 restraint. Lp and absorption corrections applied,  $\mu = 0.471$  mm<sup>-1</sup>.

Crystal data for **1**<sub>313</sub>: C<sub>62</sub>H<sub>56</sub>N<sub>6</sub>NiS<sub>2</sub>,  $M = 1007.96$ , lilac plate,  $0.30 \times 0.25 \times 0.05$  mm<sup>3</sup>, monoclinic, space group  $C2/c$  (No. 15),  $a = 10.6221(7)$ ,  $b = 23.1917(16)$ ,  $c = 23.0275(15)$  Å,  $\beta = 99.649(4)^\circ$ ,  $V = 5592.4(6)$  Å<sup>3</sup>,  $Z = 4$ ,  $D_c = 1.197$  g/cm<sup>3</sup>,  $F_{000} = 2120$ , MoK $\alpha$  radiation,  $\lambda = 0.71073$  Å,  $T = 313(2)$ K,  $2\theta_{\max} = 60.9^\circ$ , 27880 reflections collected, 7766 unique ( $R_{\text{int}} = 0.0451$ ). Final  $\text{Goof} = 0.989$ ,  $R1 = 0.0602$ ,  $wR2 = 0.1739$ ,  $R$  indices based on 3833 reflections with  $I > 2\sigma(I)$  (refinement on  $F^2$ ), 305 parameters, 1 restraint.  $L_p$  and absorption corrections applied,  $\mu = 0.465$  mm<sup>-1</sup>.

### Powder X-ray diffraction:

X-ray powder diffraction patterns were collected at room temperature on a PANalytical X'Celerator diffractometer employing Cu  $K\alpha_{1,2}$  radiation.

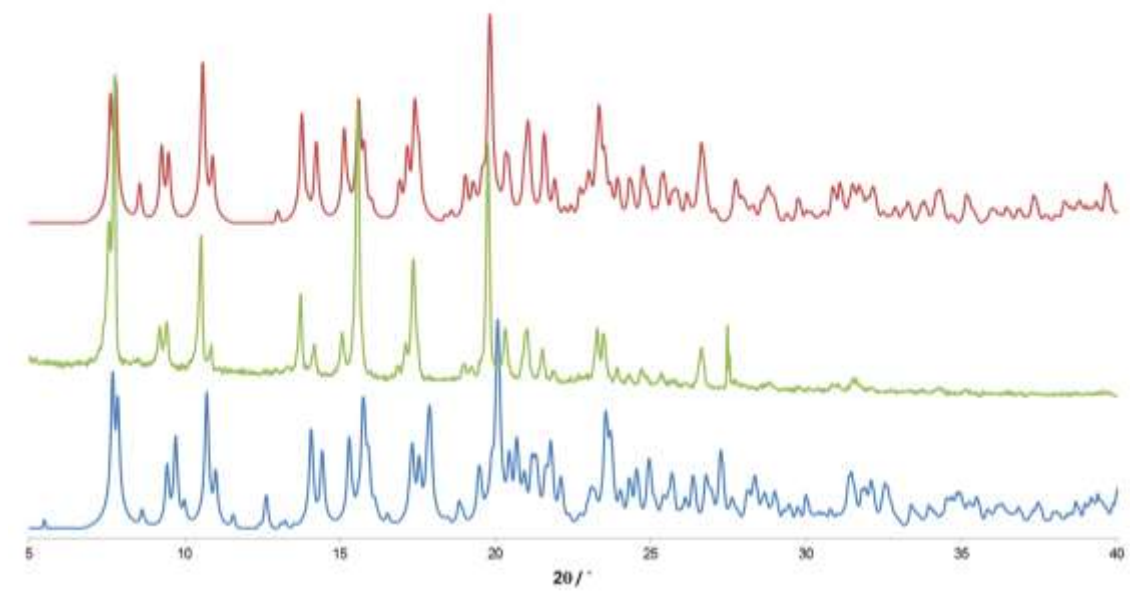

**Figure S1.** Comparison of powder X-ray diffraction measured for **1** (middle) with the patterns simulated\* for the structure determined at 100 K (bottom) and at 313 K (top).

\* experimental Cu  $K\alpha_{1,2}$  diffraction patterns were simulated from the crystallographic information file using a step size of  $0.02^\circ$  and a Gaussian peak shape with full width at maximum height (FWMH) of 0.1 in  $2\theta$ .

### Thermal Analysis:

TA Instruments Q100 DSC and Q500 TGA were used for thermal analyses. Samples with a mass of 3 to 5 mg were measured under nitrogen at a heating/cooling rate of  $15^\circ\text{C}$  per minute. TA UNIVERSAL ANALYSIS software was used for data graphics and data analysis.

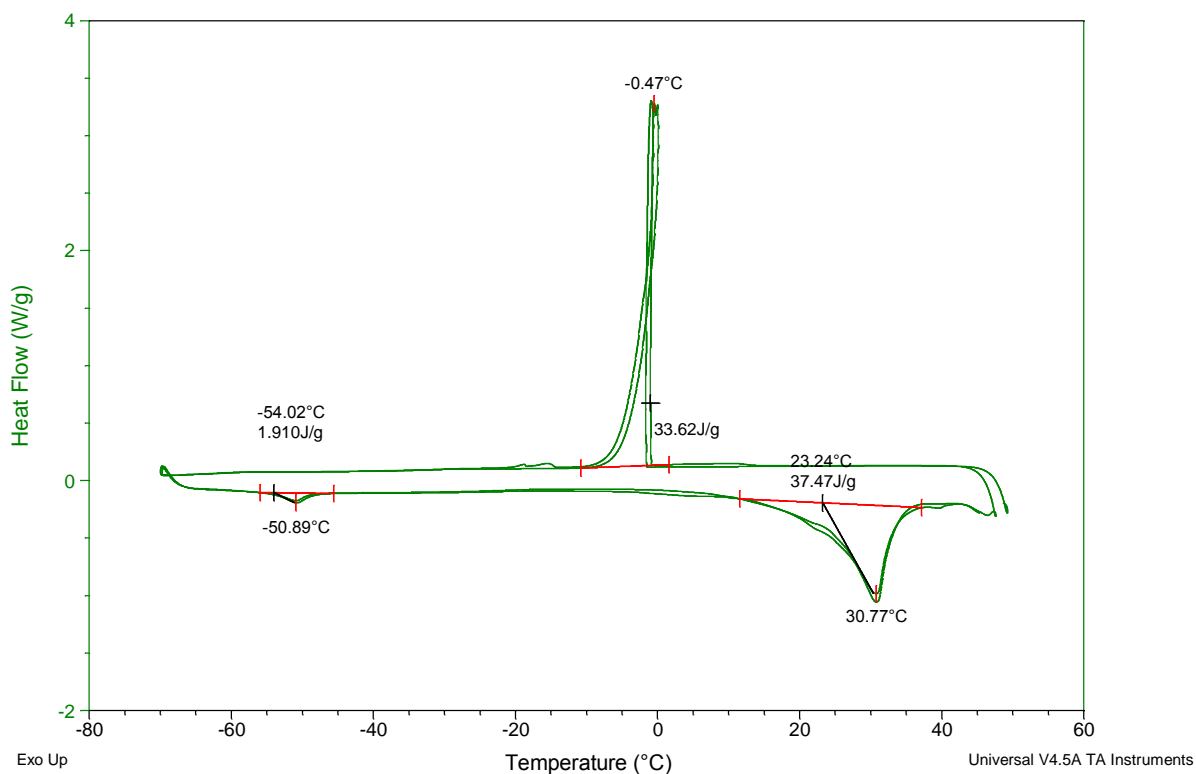

**Figure S2.** Two consecutive DSC cycles for **1** show the reversibility of the phase transitions.

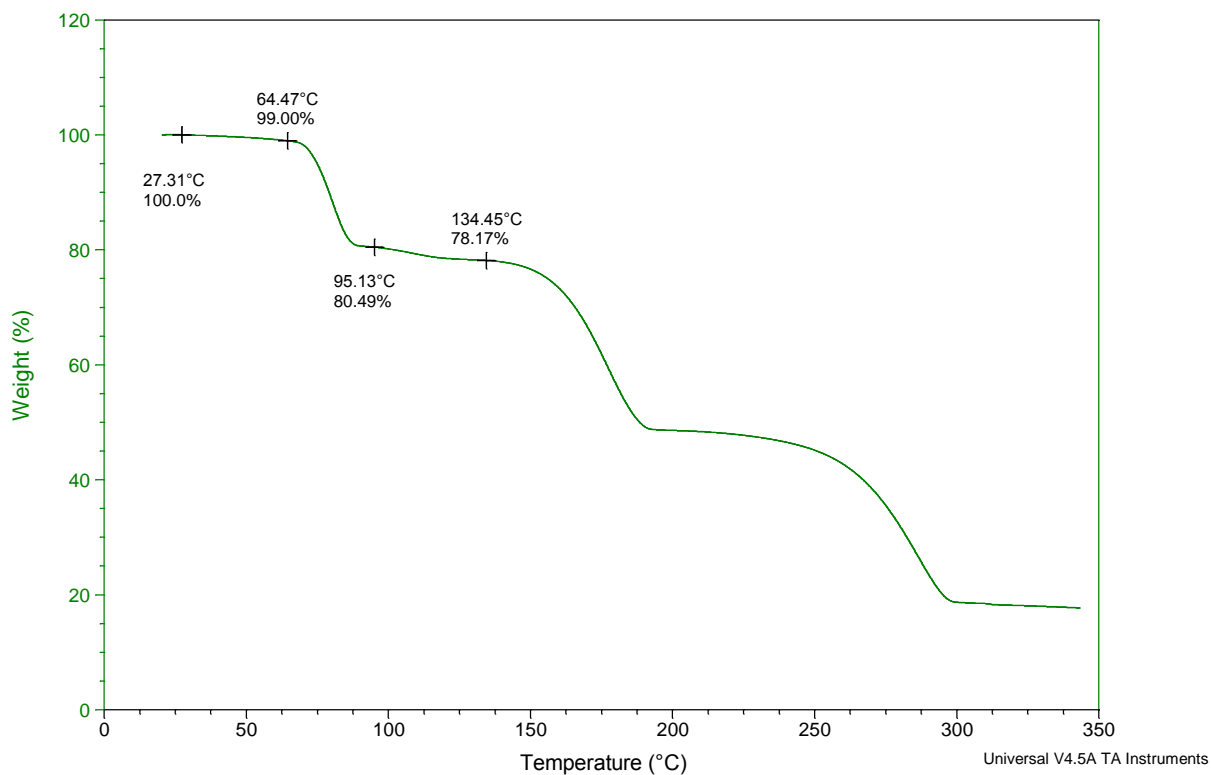

**Figure S3.** TGA for **1**: shows a loss of about 20% between 65 and 95 °C and a smaller loss of about 2% 95 and 130 °C.
